# Supplementary material for: Do Interventions to Increase Walking Work? A Systematic Review of Interventions in Children and Adolescents
Source: Springer Nature journal article supplement (doi:10.1007/s40279-015-0432-6), 2015-12-01
Supplement: MOESM1 [file 12118086]

## ELECTRONIC SUPPLEMENTARY MATERIAL

### **Electronic Supplementary Material, Table S1.** Example of search strategy in Medline OVID

---

| #  | Searches                                           |
|----|----------------------------------------------------|
| 1  | exp Walking/                                       |
| 2  | exp Gait/                                          |
| 3  | exp Locomotion/                                    |
| 4  | (activ* adj3 commut*).mp.                          |
| 5  | (activ* adj3 travel*).mp.                          |
| 6  | (activ* adj3 transport*).mp.                       |
| 7  | stair*.mp.                                         |
| 8  | pedometer.mp.                                      |
| 9  | walk.mp.                                           |
| 10 | 1 OR 2 OR 3                                        |
| 11 | 4 OR 5 OR 6 OR 7 OR 8 OR 9                         |
| 12 | 10 OR 11                                           |
| 13 | exp Motor Activity/                                |
| 14 | exp Exercise/                                      |
| 15 | 13 OR 14                                           |
| 16 | encourag*.mp.                                      |
| 17 | impact*.mp.                                        |
| 18 | intervention*.mp.                                  |
| 19 | increas*.mp.                                       |
| 20 | program*.mp.                                       |
| 21 | project*                                           |
| 22 | promot*                                            |
| 23 | stud*                                              |
| 24 | trial*                                             |
| 25 | 16 OR 17 OR 18 OR 19 OR 20 OR 21 OR 22 OR 23 OR 24 |
| 26 | exp Adolescent/                                    |
| 27 | exp Child/                                         |
| 28 | exp Schools/                                       |
| 29 | exp Students/                                      |
| 30 | young*.mp.                                         |
| 31 | college*.mp.                                       |
| 32 | exp Universities/                                  |
| 33 | 26 OR 27 OR 28 OR 29 OR 32                         |
| 34 | 30 OR 31                                           |
| 35 | 33 OR 34                                           |
| 36 | 12 AND 15 AND 25 AND 35                            |

---
